# Supplementary material for: Photosensitized oxidation of 9,10-dimethylanthracene with singlet oxygen by using a safranin O/silica composite under visible light
Source: Royal Society of Chemistry journal article supplement (doi:10.1039/c4pp00261j), 2014-11-19
Supplement: c4pp00261j1.pdf [file c4pp00261j1.pdf]

## Supplementary Information

### Photosensitized oxidation of 9,10-dimethylanthracene with singlet oxygen by using safranin O/silica composite under visible light

Elim Albiter<sup>1,2\*</sup>, Salvador Alfaro<sup>1</sup>, Miguel A. Valenzuela<sup>1</sup>

<sup>1</sup>Lab. Catálisis y Materiales. ESIQIE-Instituto Politécnico Nacional. Zacatenco, 07738 México, D.F. México.

<sup>2</sup>Centro de Ciencias Aplicadas y Desarrollo Tecnológico UNAM, Circuito Exterior S/N, Ciudad Universitaria, A. P. 70-186, C.P. 04510, México DF, México.

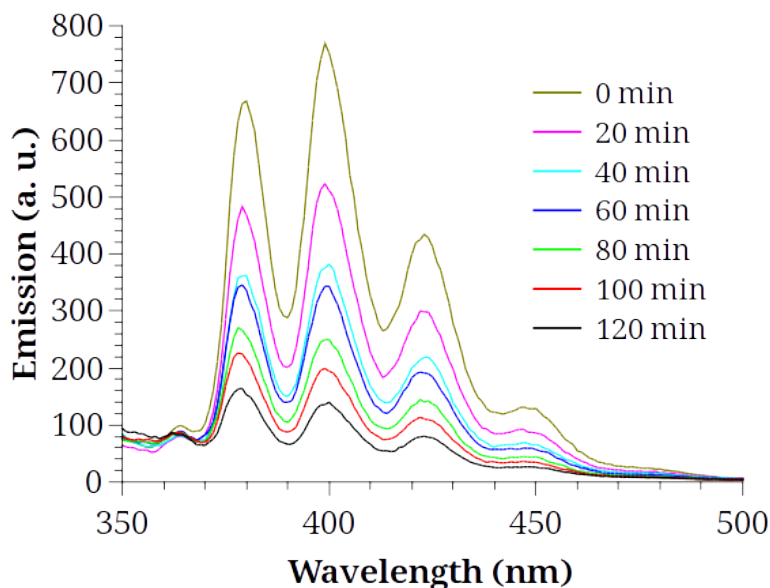

Figure S1: Decrease in light emission intensity of DMA in function of the reaction time.

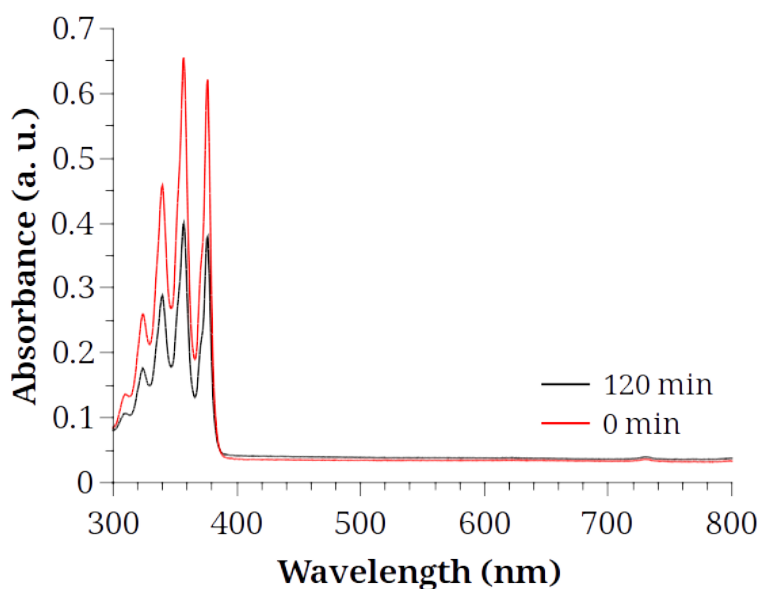

Figure S2: UV-Vis spectra of the reaction media at the beginning and after 120 min of irradiation.

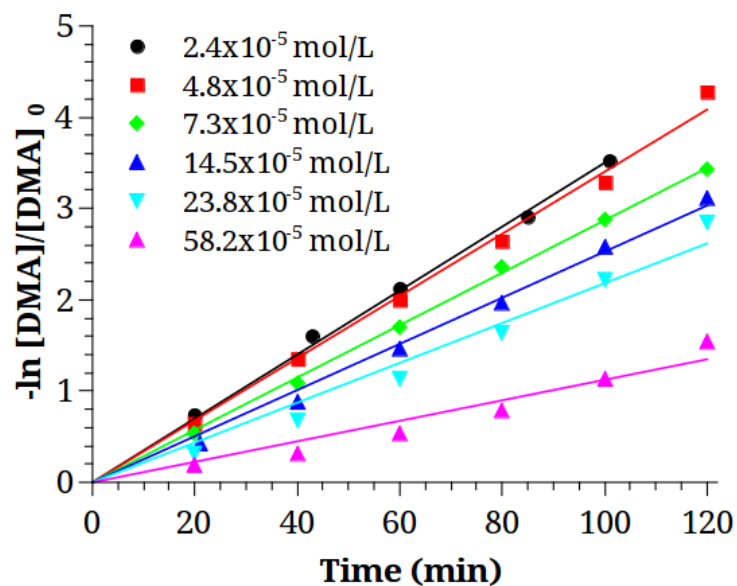

Figure S3: First-order kinetic fitting of DMA concentration versus time for different initial concentrations of DMA.

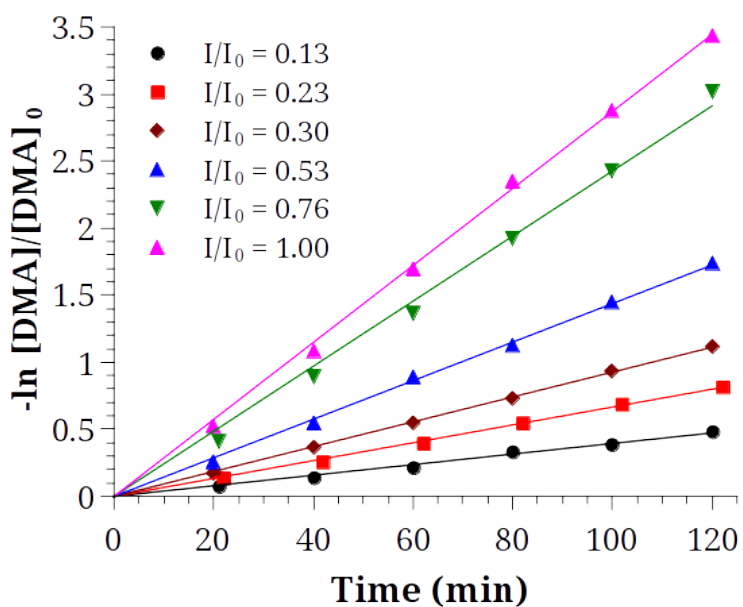

Figure S4: First-order kinetic fitting of DMA concentration versus time for different light intensities.
